# Supplementary material
Source: PubMed Central journal article supplement (PMC4787851)
Supplement: wesh773226.ww1_default.pdf [file wesh773226.ww1_default.pdf]

**Web extra figures and tables**

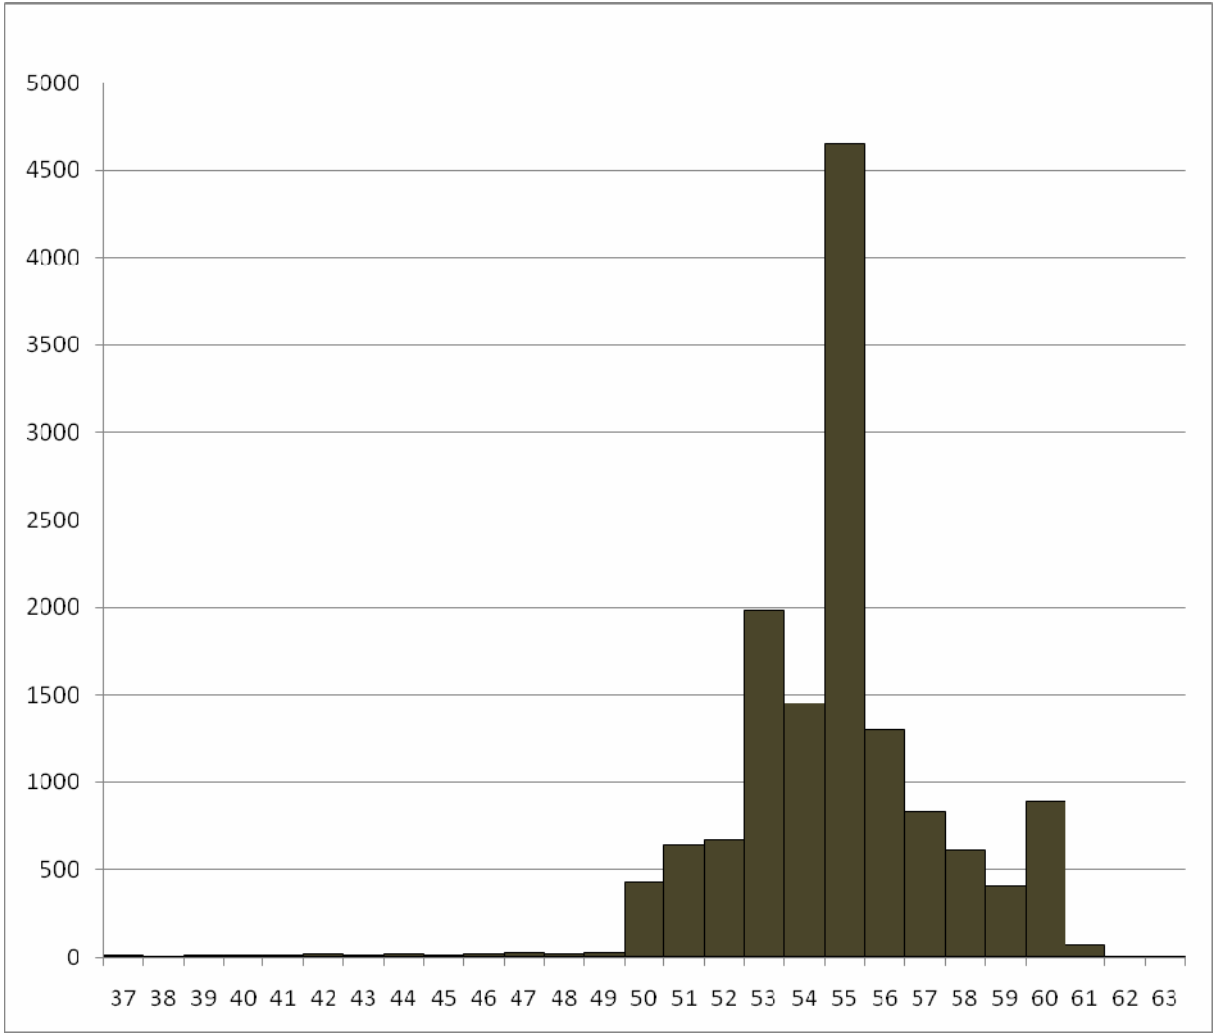

**Fig. A** – Number of participants in the study who retired from active service in EDF-GDF at different ages (all retired by age 64).

**Table A** — Sample characteristics, and health status one year before retirement (year –1) in relation to prevalence of mental and physical fatigue before retirement.

| Characteristic                                     | Number (%) | Odds ratios and 95% CIs for fatigue in the upper quintile before retirement (year -1) <sup>1</sup> |                                  |
|----------------------------------------------------|------------|----------------------------------------------------------------------------------------------------|----------------------------------|
|                                                    |            | Mental fatigue                                                                                     | Physical fatigue                 |
| Sex                                                |            |                                                                                                    |                                  |
| men                                                | 11246 (80) | 1                                                                                                  | 1                                |
| women                                              | 2858 (20)  | 1.31 (1.18 to 1.44)                                                                                | 1.79 (1.62 to 1.99)              |
| Age at retirement                                  |            |                                                                                                    |                                  |
| <55 years of age                                   | 5348 (38)  | 1.29 (1.17 to 1.41)                                                                                | 1.16 (1.04 to 1.28)              |
| 55 years of age                                    | 4653 (33)  | 1                                                                                                  | 1                                |
| >55 years of age                                   | 4103 (29)  | 0.86 (0.77 to 0.95)                                                                                | 0.96 (0.85 to 1.07)              |
| Employment grade                                   |            |                                                                                                    |                                  |
| higher                                             | 4781 (34)  | 1                                                                                                  | 1                                |
| intermediate                                       | 7654 (54)  | 0.97 (0.89 to 1.06)                                                                                | 1.07 (0.96 to 1.18)              |
| lower                                              | 1654 (12)  | 0.99 (0.86 to 1.13)                                                                                | 1.34 (1.16 to 1.56)              |
| Marital status                                     |            |                                                                                                    |                                  |
| not married/cohabitating                           | 1511 (11)  | 1                                                                                                  | 1                                |
| married or cohabitating                            | 12589 (89) | 1.01 (0.89 to 1.15)                                                                                | 0.86 (0.75 to 0.99)              |
| Health status one year before retirement (year –1) |            |                                                                                                    |                                  |
| Respiratory disease <sup>2</sup>                   | 1770 (13)  | 1.31 (1.17 to 1.47)                                                                                | 1.49 (1.32 to 1.68)              |
| Diabetes <sup>2</sup>                              | 617 (4)    | 1.31 (1.09 to 1.57)                                                                                | 1.55 (1.28 to 1.88)              |
| Coronary heart disease or stroke <sup>2</sup>      | 453 (3)    | 1.95 (1.59 to 2.39)                                                                                | 2.57 (2.09 to 3.17)              |
| Depressive symptoms <sup>3</sup>                   | 723 (25)   | 3.21 (2.90 to 3.56) <sup>5</sup>                                                                   | 2.94 (2.63 to 3.30) <sup>5</sup> |
| Mental fatigue (upper quintile) <sup>4</sup>       | 3488 (29)  | N/A                                                                                                | 13.9 (12.5 to 15.4)              |
| Physical fatigue (upper quintile) <sup>4</sup>     | 2564 (21)  | 13.9 (12.6 to 15.5)                                                                                | N/A                              |

<sup>1</sup> Estimated based on generalised estimating equation models adjusted for sex, age at retirement, and employment grade one year before retirement (year –1).

<sup>2</sup> Cumulative prevalence since year –7.

<sup>3</sup> Prevalence in the sub-sample who responded to the CES-D questionnaire in the seventh and first year before retirement respectively.

<sup>4</sup> Prevalence of a fatigue rating of 5-8 on an 8-point scale, roughly corresponding to the upper quintile in the whole dataset.

<sup>5</sup> Odds ratio comparing those who scored above the cut-off for depression in CES-D any of the seven years before retirement with those who had responded to CES-D at least once during that time without scoring above the cut-off.

**Table B** – Change over time in all studied outcome variables including sensitivity analyses in a dataset with only complete case data.

| Outcome variable                     | Main effect of time | Odds ratios (95% CI) <sup>1</sup> |                     |                     |
|--------------------------------------|---------------------|-----------------------------------|---------------------|---------------------|
|                                      |                     | year -1 vs. year -7               | year +1 vs. year -1 | year +7 vs. year +1 |
| Respiratory disease                  |                     |                                   |                     |                     |
| total sample <sup>2</sup>            | p<0.0001            | 3.63 (3.33 to 3.96)               | 1.18 (1.16 to 1.21) | 1.44 (1.40 to 1.88) |
| only complete-case data <sup>3</sup> | p<0.0001            | 4.04 (3.48 to 4.70)               | 1.14 (1.10 to 1.18) | 1.37 (1.30 to 1.43) |
| Diabetes                             |                     |                                   |                     |                     |
| total sample <sup>2</sup>            | p<0.0001            | 3.26 (2.85 to 3.72)               | 1.21 (1.17 to 1.25) | 1.63 (1.55 to 1.72) |
| only complete-case data <sup>3</sup> | p<0.0001            | 3.19 (2.58 to 3.95)               | 1.17 (1.10 to 1.25) | 1.54 (1.41 to 1.67) |
| Coronary heart disease or stroke     |                     |                                   |                     |                     |
| total sample <sup>2</sup>            | p<0.0001            | 4.93 (3.99 to 6.10)               | 1.33 (1.27 to 1.39) | 1.99 (1.87 to 2.12) |
| only complete-case data <sup>3</sup> | p<0.0001            | 4.70 (3.38 to 6.53)               | 1.31 (1.20 to 1.44) | 1.90 (1.70 to 2.12) |
| Mental fatigue                       |                     |                                   |                     |                     |
| total sample <sup>2</sup>            | p<0.0001            | 1.00 (0.95 to 1.06)               | 0.19 (0.18 to 0.21) | 1.47 (1.33 to 1.62) |
| only complete-case data <sup>3</sup> | p<0.0001            | 1.23 (1.13 to 1.33)               | 0.15 (0.13 to 0.18) | 1.53 (1.28 to 1.83) |
| Physical fatigue                     |                     |                                   |                     |                     |
| total sample <sup>2</sup>            | p<0.0001            | 1.13 (1.06 to 1.20)               | 0.27 (0.26 to 0.30) | 1.46 (1.32 to 1.61) |
| only complete-case data <sup>3</sup> | p<0.0001            | 1.43 (1.29 to 1.58)               | 0.22 (0.18 to 0.25) | 1.81 (1.50 to 2.18) |
| Depressive symptoms                  |                     |                                   |                     |                     |
| total sample <sup>2</sup>            | p<0.0001            | 1.06 (0.91 to 1.25)               | 0.60 (0.53 to 0.67) | 1.05 (0.92 to 1.19) |
| only complete-case data <sup>3</sup> | p<0.0001            | not estimated <sup>4</sup>        | 0.67 (0.55 to 0.84) | 0.79 (0.13 to 1.09) |

<sup>1</sup>Adjusted for time period only (1989-1999 vs. 2000-2007).

<sup>2</sup>As reported in the paper, Figure 1.

<sup>3</sup>Restricted to participants who returned all yearly questionnaires in the 15-year observation window.

<sup>4</sup>No data available for year -7 through year -5 since CES-D was measured for the first time in 1996.

**Table C** — Synergy index for the additive interaction between work and chronic diseases before retirement on mental and chronic fatigue.

| Health condition                 | Synergy index (95% CI) |                     |
|----------------------------------|------------------------|---------------------|
|                                  | Mental fatigue         | Physical Fatigue    |
| Respiratory disease              | 1.21 (1.05 to 1.40)    | 1.34 (1.13 to 1.58) |
| Diabetes                         | 1.17 (0.92 to 1.47)    | 1.25 (0.95 to 1.64) |
| Coronary heart disease or stroke | 1.85 (1.44 to 2.38)    | 2.10 (1.58 to 2.80) |
| Any chronic disease <sup>1</sup> | 1.30 (1.16 to 1.47)    | 1.43 (1.24 to 1.65) |

<sup>1</sup>Respiratory disease, diabetes, coronary heart disease, or stroke.

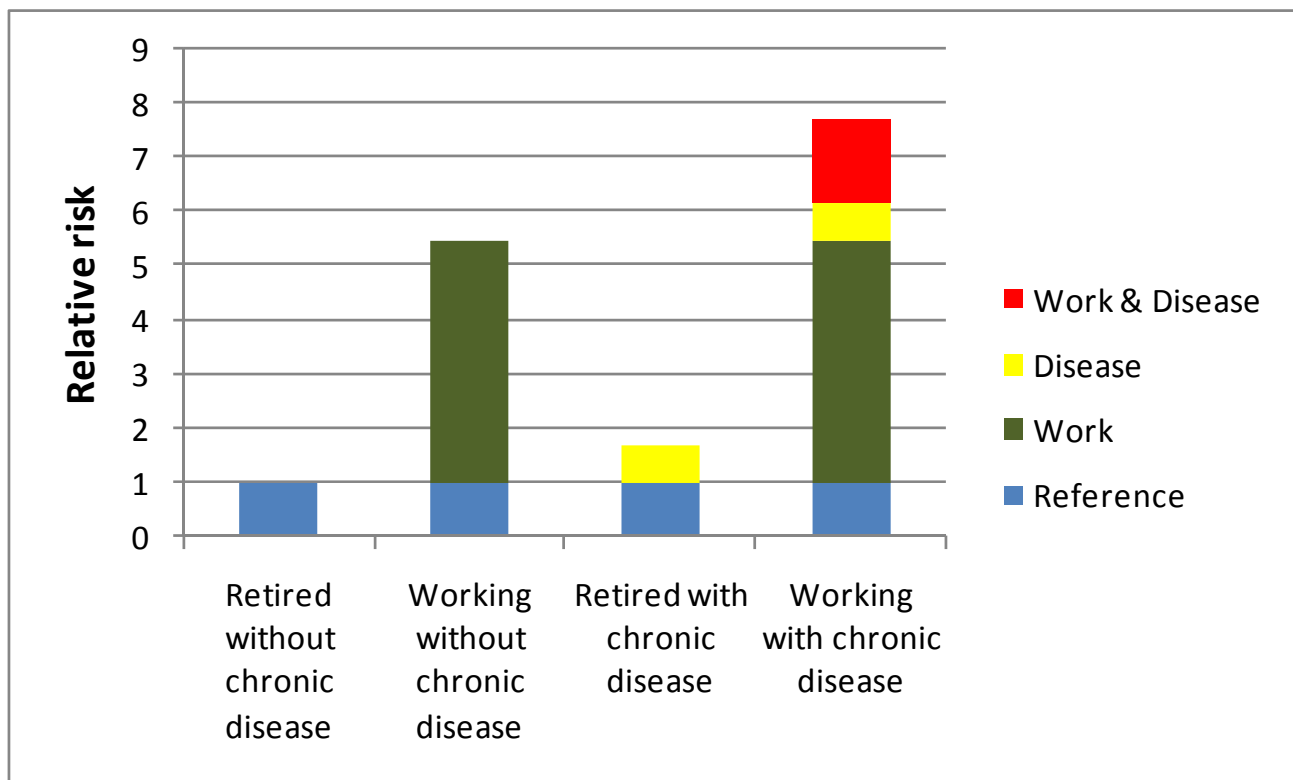

**Fig. B** — Illustration of the contributions of work (vs. retirement), any chronic physical disease, and the additive interaction (synergy) between them on the relative risk of mental fatigue. The blue base is the common reference category (retired, no chronic conditions) defined as 1. Calculations according to Anderson and colleagues.<sup>1</sup>

1. Andersson T, Alfredsson L, Kallberg H, Zdravkovic S, Ahlbom A. Calculating measures of biological interaction. *Eur J Epidemiol* 2005;20:575-9.
